# Supplementary material
Source: Royal Society of Chemistry journal article supplement (doi:10.1039/d6nr00929h)
Supplement: d6nr00929h1.pdf [file d6nr00929h1.pdf]

# Influence of Composition-Phase Interplay on Electrochemical Activity of Ternary Transition Metal Dichalcogenides

*Manoj Palabathuni, Niraj Nitish Patil, Suvodeep.Sen, Geetu Kumari, Sarah Guerin, Shalini Singh\**

*Email : [shalini.singh@ul.ie](mailto:shalini.singh@ul.ie)*

## **Experimental Section**

**Chemicals** : Niobium chloride ( $\text{NbCl}_5$ , 99.9%), Tungsten hexacarbonyl ( $\text{W}(\text{CO})_6$ , 99.9%), Sulfur powder (S, 99.9%), Oleylamine (OLA, 70%), Toluene (Tol), Isopropanol (IPA) were purchased from Lennox, Ireland. OLA was purified at  $120^\circ\text{C}$  and stored in glovebox before using for reactions. Rest of the chemicals were used as received without any further purifications.

## **Synthesis of $\text{Nb}_x\text{W}_{1-x}\text{S}_2$ nanosheets**

All the chemicals used are purchased from sigma Aldrich. The  $\text{Nb}_x\text{W}_{1-x}\text{S}_2$  nanosheets were prepared by using a hot injection colloidal synthetic route. Whole reaction procedure is processed in Schlenk line under the Ar flow.

Start with 7 ml of oleylamine (OAm) in a three necked round bottomed flask was degassed at  $120^\circ\text{C}$  for 30 mins, then the temperature is raised to  $300^\circ\text{C}$ . Thereafter, in a vial 1.0 mmol of  $\text{W}(\text{CO})_6$  and  $\text{NbCl}_5$  were dissolved in 2 ml of OAm, the mixture was kept at  $120^\circ\text{C}$  for 30 min. In the same way, 2 mmol of S is dissolved in 2 ml of OAm in a separate vial, the solution was

heated at 80°C for 30 min. Once the mixtures are properly dissolved, metal and chalcogen mixture are mixed and injected into RB at 320°C with a rate of 0.5 mL min<sup>-1</sup>. The reaction temperature was maintained at 320°C throughout the reaction time (2 hr). Further allowed to cool down to room temperature by removing heating mantle.

### **Purification of nanosheets**

Washing procedure is fully carried out in glovebox. The synthesized nanosheets are poured in 50 ml centrifuge tube then added 8 ml of toluene and vortexed well and centrifuged at 5000 rpm for 5 min. The pellet was collected and further dispersed in 10 ml of toluene and 10 ml of isopropanol then vortexed and sonicated to disperse and centrifuged another 2 times and dried under vacuum for overnight.

### **Instrumentation**

**Electron Microscopy.** For TEM analysis, the NCs were dispersed in hexane and drop-cast on continuous carboncoated 300 mesh copper grids. Low-resolution and high-resolution TEM (HRTEM) was conducted by using 200 kV Talos F200i field-emission microscope equipped with a Gatan UltraScan CCD camera and EDAX Genesis energy dispersive X-ray spectroscopy (EDS) detector and Thermo-Fisher Scientific FEI double-aberration-corrected monochromatic Titan Themis with a double tilt holder was used for aberration-corrected TEM and scanning transmission electron microscopy analysis. For analyzing the HRTEM data, interplanar distances and particle orientation were determined from the selected area FFT analysis using GMS3 software.

**X-ray diffraction (XRD) analysis.** XRD of drop-cast films of the NCs on the flat surface of p-type boron doped silicon zero background was conducted using a PANalytical Empyrean instrument equipped with a Cu K $\alpha$  radiation source ( $\lambda = 1.5418 \text{ \AA}$ ) and a 1-D X'celerator strip detector with the diffractometer operating at 40 kV and 40 mA.

**X-ray photoelectron spectroscopy (XPS).** XPS analysis was conducted using a Kratos AXIS ULTRA spectrometer equipped with a monochromatic Al K $\alpha$  (1486.58 eV) X-ray source. Calibration was carried out based on the C 1s peak at 284.8 eV. Data processing, including spectrum construction and peak fitting, was completed using Casa XPS software. The XPS measurements were performed on vacuum-dried nanostructure samples to ensure accuracy and consistency in the analysis.

**Scanning electron microscopy.** Morphology and elemental analysis of the particles examined by field-emission scanning electron microscopy (SEM) on an Auriga Zeiss operated at 5.0 keV.

**Electrochemical measurement.** All the Electrochemical measurements were conducted at room temperature using an electrochemical workstation with a standard three-electrode setup in a 0.5 M H<sub>2</sub>SO<sub>4</sub> solution. The as-prepared Nb<sub>x</sub>W<sub>1-x</sub>S<sub>2</sub> nanosheets served as the working electrodes, with an Ag/AgCl electrode as the reference and a Pt wire as the counter electrode. All measured potentials were converted to the reversible hydrogen electrode (RHE) using the equation  $E(\text{RHE}) = E(\text{Ag}/\text{AgCl}) + 0.059\text{pH} + 0.197$ . Linear sweep voltammetry (LSV) was performed within a potential range of 0 to -0.8 V vs RHE at a scan rate of 2 mV s<sup>-1</sup> for the HER. Tafel plots were generated using the Tafel equation ( $\eta = a + b \log j$ ), where  $j$  represents current density,  $b$  is the Tafel slope, and  $a$  is the intercept. Electrochemical impedance spectroscopy (EIS) measurements were taken across a frequency range of 100 kHz to 0.1 Hz, with an AC voltage amplitude of 10 mV. Catalyst durability was assessed via chronoamperometry at a fixed bias over 100 hours.

**Nanosheets measurements.** The dimensions were measured using ImageJ by drawing a line across the lateral dimension (diameter/edge-to-edge distance) of each nanosheet in the microscopy image. For less well-defined nanosheets, the longest visible lateral dimension was used as an approximate size measure.

### Working Electrode preparation.

≈5 mg of the nanosheet catalyst and 1 mg of carbon black was homogeneously dispersed in 500 μl of IPA, 50 μl of distilled water, and 20 μl of 5 wt% Nafion (binder) by 60 min ultrasonication forming casting ink. 5 μl of this prepared ink is drop-casted on the prepolished glassy carbon electrode to coat a 0.62 mg cm<sup>-2</sup> active catalyst layer.

Table S1. Concentration of Nb and S vacancies in all the compositions confirmed by SEM,

| Nb <sub>x</sub> W <sub>1-x</sub> S <sub>2</sub> | Stoichiometric ratios |         |         |      |         |                  |
|-------------------------------------------------|-----------------------|---------|---------|------|---------|------------------|
|                                                 | Nb                    |         |         | S    |         |                  |
|                                                 | XPS                   | SEM EDX | ICP-OES | XPS  | SEM EDX | Avg. S Vacancies |
| 0 (WS <sub>2</sub> )                            | 0                     | 0       | 0       | 2.12 | 2.07    | 2.09             |
| 0.1                                             | 0.10                  | 0.15    | 0.11    | 2.02 | 1.87    | 1.94             |
| 0.3                                             | 0.32                  | 0.31    | 0.34    | 1.86 | 1.84    | 1.85             |
| 0.5                                             | 0.58                  | 0.60    | 0.55    | 1.93 | 1.83    | 1.88             |
| 0.7                                             | 0.68                  | 0.74    | 0.75    | 1.91 | 1.87    | 1.89             |
| 0.9                                             | 0.84                  | 0.91    | 0.89    | 1.63 | 1.67    | 1.65             |

TEM and ICP-OES.

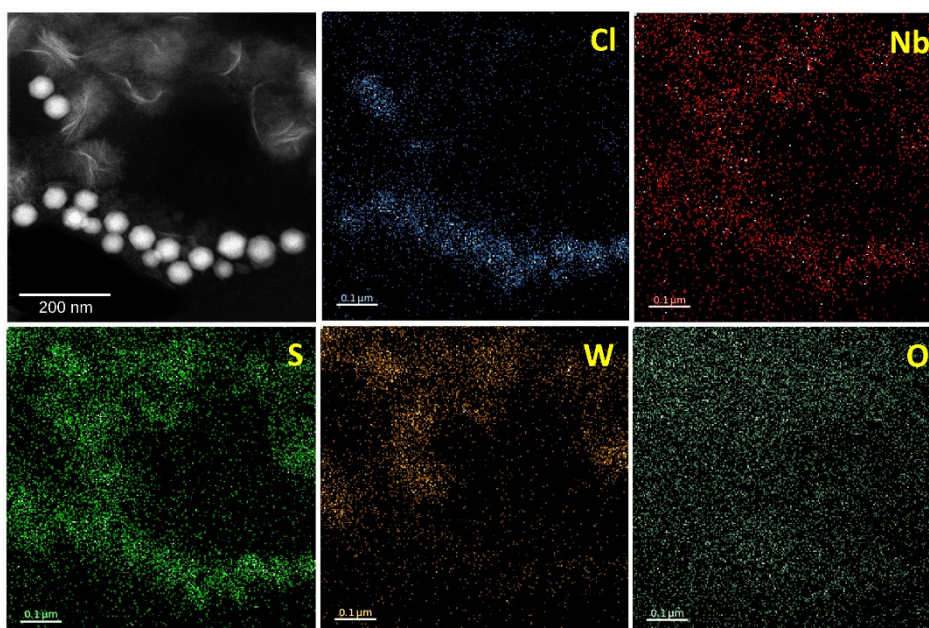

Figure S1. STEM image and elemental mapping of  $\text{Nb}_x\text{W}_{1-x}\text{S}_2$  composition with oxide by-products.

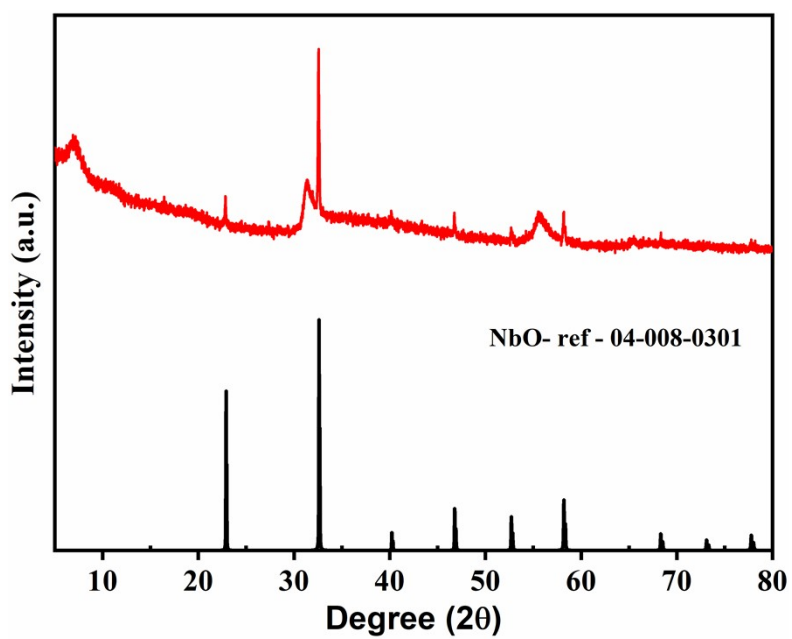

Figure S2. X-ray diffraction of as synthesized  $\text{Nb}_{0.5}\text{W}_{1-0.5}\text{S}_2$  using  $\text{WCl}_6$  as W source.

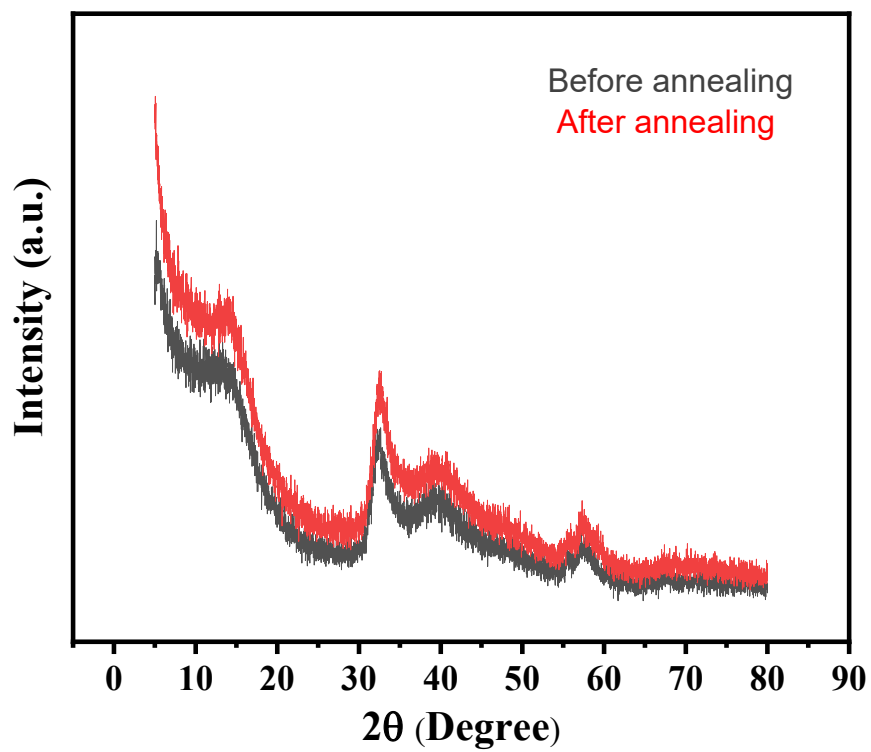

Figure S3. XRD of  $\text{Nb}_{0.5}\text{W}_{1-0.5}\text{S}_2$  before and after annealing at  $400^\circ\text{C}$  in Ar.

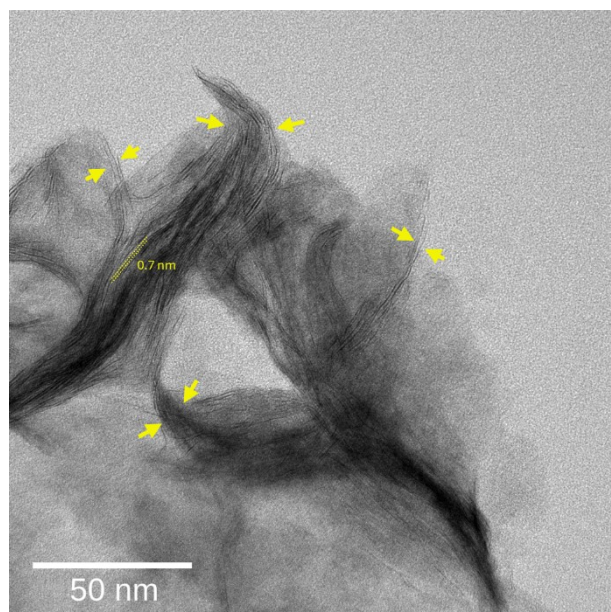

Figure S4. TEM image of  $\text{Nb}_{0.5}\text{W}_{1-0.5}\text{S}_2$  nanosheets, highlighted interlayer spacing.

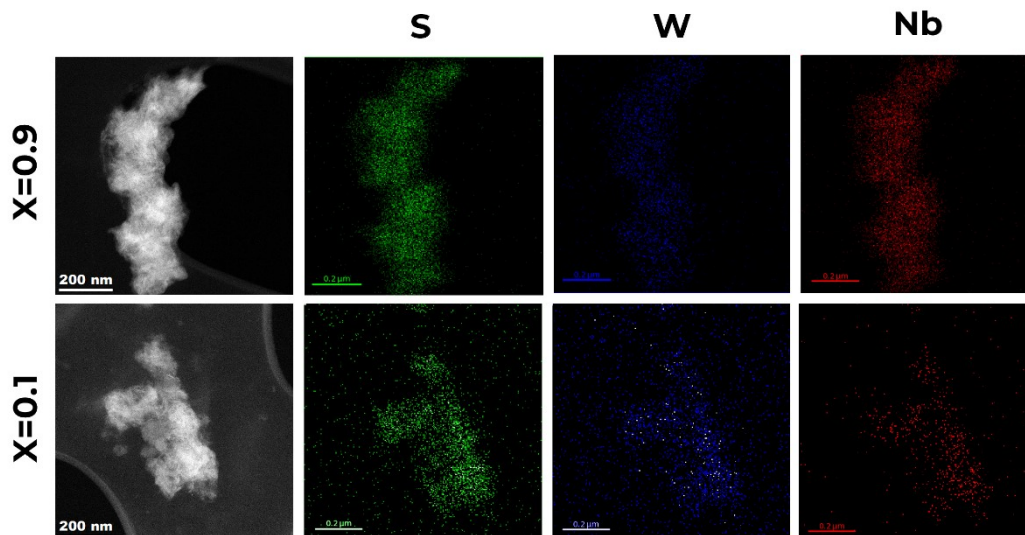

Figure S5. STEM elemental mapping of  $\text{Nb}_x\text{W}_{1-x}\text{S}_2$  ( $x = 0.1$  &  $0.9$ ).

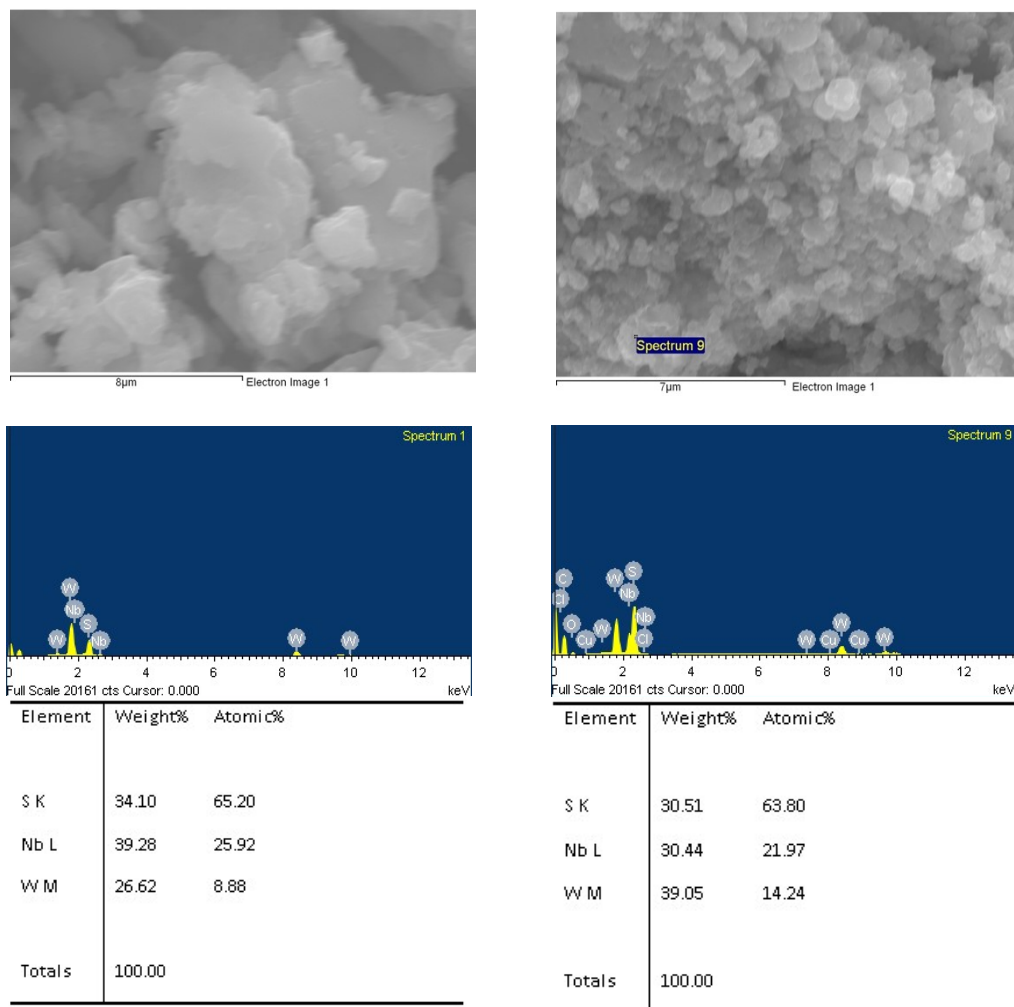

Figure S6. SEM – EDS spectrum of  $\text{Nb}_{0.1}\text{W}_{1-0.1}\text{S}_2$  (left) and  $\text{Nb}_{0.5}\text{W}_{1-0.5}\text{S}_2$  (right).

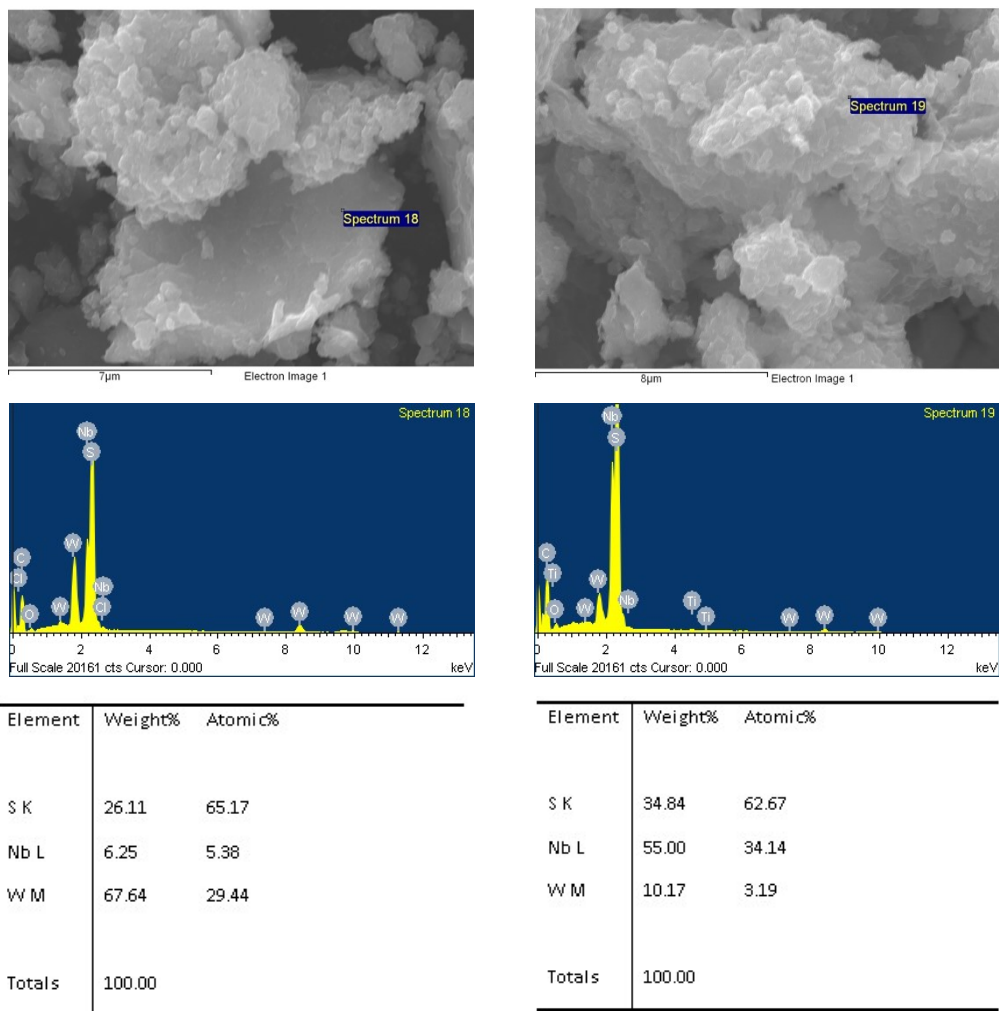

Figure S7. SEM – EDS spectrum of  $\text{Nb}_{0.7}\text{W}_{1-0.7}\text{S}_2$  (left) and  $\text{Nb}_{0.9}\text{W}_{1-0.9}\text{S}_2$  (right).

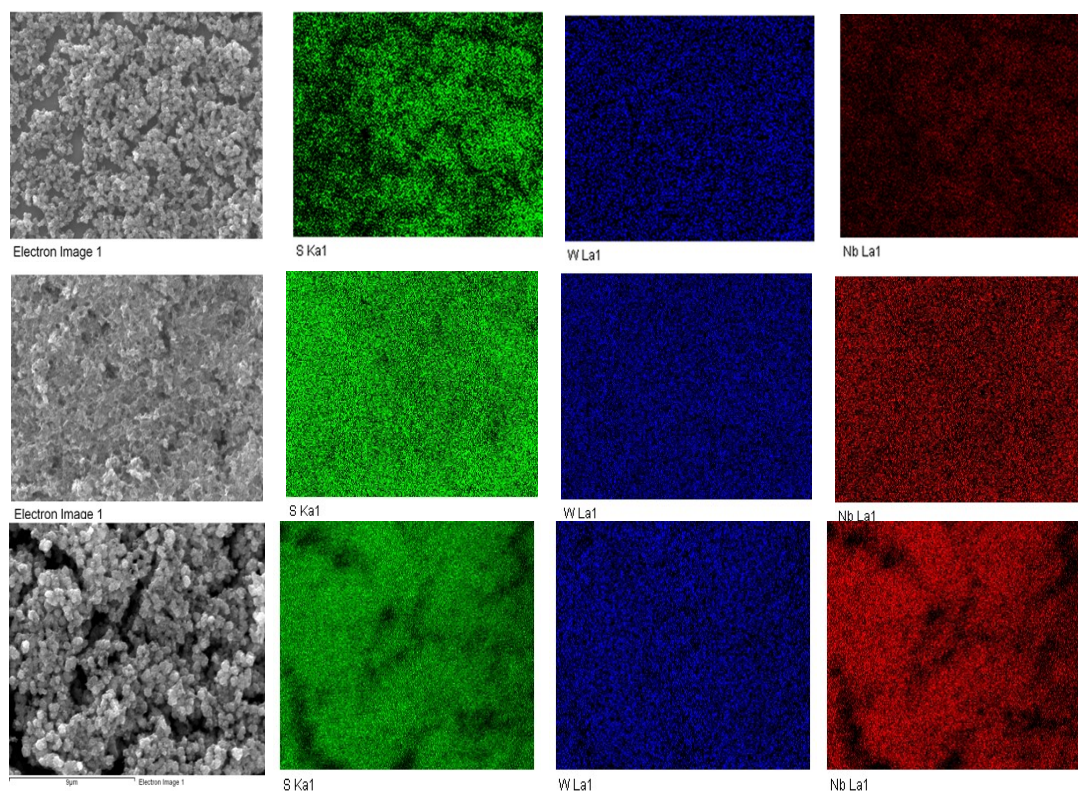

Figure S8. SEM – EDX mapping of  $\text{Nb}_x\text{W}_{1-x}\text{S}_2$  ( $x = 0.1, 0.5 \text{ \& } 0.9$ ).

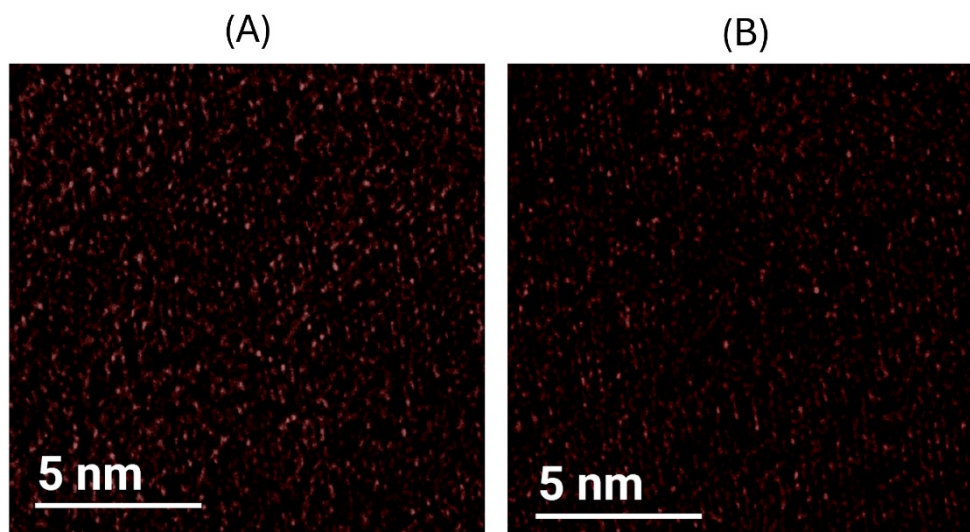

Figure S9. Contrasted HRTEM of  $\text{Nb}_x\text{W}_{1-x}\text{S}_2$  ( $x = 0.3 \text{ \& } 0.5$ ).

Table S2. Yield of all the  $\text{Nb}_x\text{W}_{1-x}\text{S}_2$  compositions.

| Nb fraction | Composition                               | Theoretical weight (mg) | Yield weight | Yield (%) |
|-------------|-------------------------------------------|-------------------------|--------------|-----------|
| 0.1         | $\text{Nb}_{0.1}\text{W}_{0.9}\text{S}_2$ | 119                     | 90           | 75.6      |
| 0.3         | $\text{Nb}_{0.3}\text{W}_{0.7}\text{S}_2$ | 110                     | 92           | 83.6      |
| 0.5         | $\text{Nb}_{0.5}\text{W}_{0.5}\text{S}_2$ | 101                     | 83           | 82.2      |
| 0.7         | $\text{Nb}_{0.7}\text{W}_{0.3}\text{S}_2$ | 92                      | 80           | 87        |
| 0.9         | $\text{Nb}_{0.9}\text{W}_{0.1}\text{S}_2$ | 83                      | 73           | 88        |

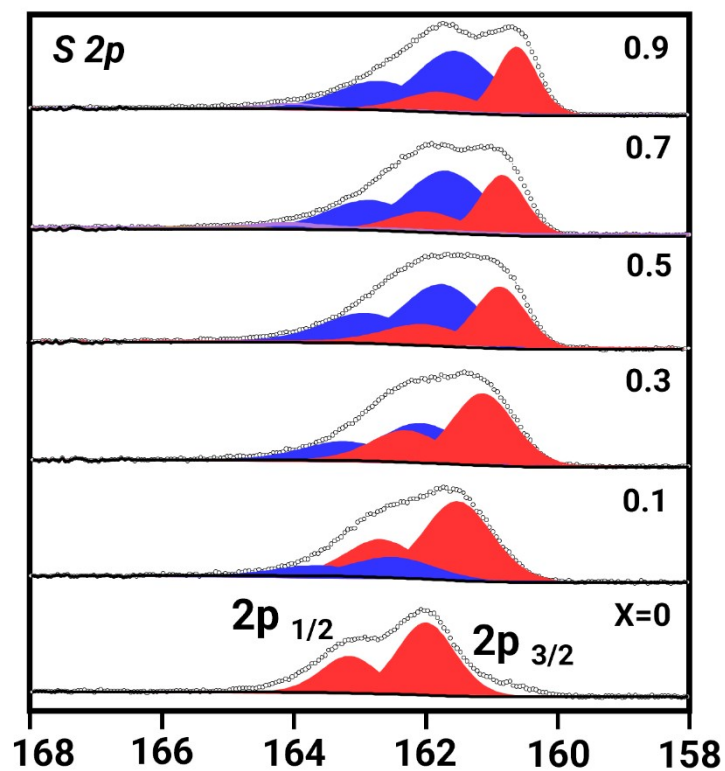

Figure S10. XPS - sulfur 2p spectra of ( $x = 0$  to 0.9)  $\text{Nb}_x\text{W}_{1-x}\text{S}_2$ .

The assigned peaks for sulfur, S 2p<sub>3/2</sub> and 2p<sub>1/2</sub> peaks appears at 162 and 163.17 eV respectively, with splitting of 1.17 eV, this represents a redshift of 2.2 eV compared to neutral S (S<sup>0</sup>) peaks at 164.2 and 165.2 eV. The peaks in X=0 correspond (assigned to S1) to the S<sup>2-</sup> anion bonded to the cation (W) in WS<sub>2</sub> in 2H phase.<sup>6</sup> In case of X<sub>≥</sub>0.1 it resolved in to four bands, two corresponds (S1 band) to S binding with the W<sup>4+</sup>/Nb<sup>4+</sup> and the remaining two binding (S2 band) with the Nb<sup>3+</sup>. The S2 band becomes more significant with increase in x, from the increased contribution of Nb<sup>3+</sup>.

Table S3. HER performance comparison with previous reports.

| Compositions                                          | Overpotential | Tafel slope ( <i>b</i> ) | Ref          |
|-------------------------------------------------------|---------------|--------------------------|--------------|
| Nb <sub>x</sub> W <sub>1-x</sub> S <sub>2</sub>       | 190           | 120                      | Current work |
| WS <sub>2</sub> -Nb                                   | –             | 167                      | 1            |
| WS <sub>2</sub> -Ta                                   | –             | –                        |              |
| WSSe-rGO                                              | 285           | 98                       | 2            |
| WS <sub>2</sub> -WO <sub>3</sub>                      | 305           | 134                      | 3            |
| WS <sub>2</sub> NFs                                   | 351           | 84                       |              |
| W <sub>x</sub> Mo <sub>1-x</sub> S <sub>2</sub> -rGO  | 285           | 38.7                     | 4            |
| Nb <sub>x</sub> W <sub>1-x</sub> S <sub>y</sub> films | 222           | 126                      | 5            |

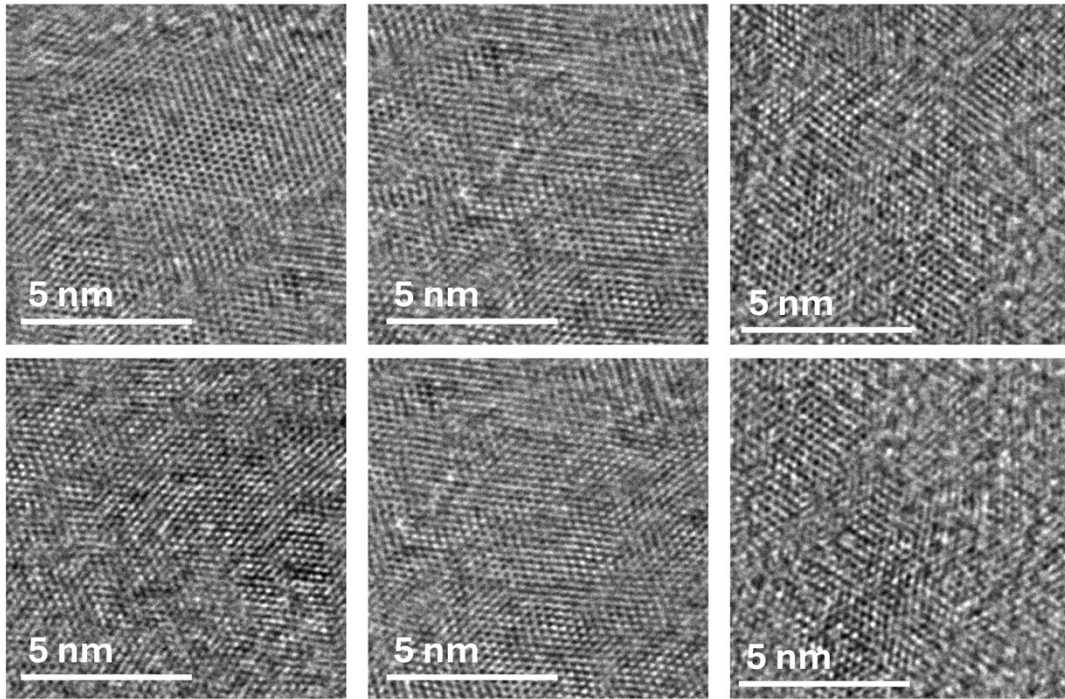

Figure S11. Additional HRTEM of  $\text{Nb}_x\text{W}_{1-x}\text{S}_2$  ( $x = 0.1$ ).

Table S4.  $2(\theta)$  values of (100) and (008) planes derived to calculate a and c lattice constants.

| Composition ( $x$ ) | $2(\theta)$ |       |
|---------------------|-------------|-------|
|                     | (100)       | (008) |
| 0                   | 33.08       | 58.74 |
| 0.1                 | 32.25       | 56.94 |
| 0.3                 | 32.46       | 57.33 |
| 0.5                 | 31.66       | 56.31 |
| 0.7                 | 31.96       | 56.37 |
| 0.9                 | 32.36       | 57.49 |

## REFERENCES

- (1) Chua, X. J.; Luxa, J.; Eng, A. Y. S.; Tan, S. M.; Sofer, Z.; Pumera, M. Negative Electrocatalytic Effects of P-Doping Niobium and Tantalum on MoS<sub>2</sub> and WS<sub>2</sub> for the Hydrogen Evolution Reaction and Oxygen Reduction Reaction. *ACS Catal.* **2016**, *6* (9), 5724–5734. <https://doi.org/10.1021/acscatal.6b01593>.
- (2) Gowrisankar, A.; Sherryn, A. L.; Selvaraju, T. In Situ Integrated 2D Reduced Graphene Oxide Nanosheets with MoSSe for Hydrogen Evolution Reaction and Supercapacitor Application. *Appl. Surf. Sci. Adv.* **2021**, *3*, 100054. <https://doi.org/10.1016/j.apsadv.2020.100054>.
- (3) Nguyen, T. V.; Nguyen, T. P.; Le, Q. V.; Dao, D. V.; Ahn, S. H.; Kim, S. Y. Facile Route for Synthesizing WS<sub>2</sub>/W<sub>2</sub>C Nano Hollow Flowers and Their Application for Hydrogen Evolution Reaction. *J. Alloys Compd.* **2023**, *955*, 170231. <https://doi.org/10.1016/j.jallcom.2023.170231>.
- (4) Lei, Y.; Pakhira, S.; Fujisawa, K.; Wang, X.; Iyiola, O. O.; Perea López, N.; Laura Elías, A.; Pulickal Rajukumar, L.; Zhou, C.; Kabius, B.; Alem, N.; Endo, M.; Lv, R.; Mendoza-Cortes, J. L.; Terrones, M. Low-Temperature Synthesis of Heterostructures of Transition Metal Dichalcogenide Alloys (W<sub>x</sub>Mo<sub>1-x</sub>S<sub>2</sub>) and Graphene with Superior Catalytic Performance for Hydrogen Evolution. *ACS Nano* **2017**, *11* (5), 5103–5112. <https://doi.org/10.1021/acsnano.7b02060>.
- (5) Schulpen, J. J. P. M.; Lam, C. H. X.; Dawley, R. A.; Li, R.; Jin, L.; Ma, T.; Kessels, W. M. M.; Koester, S. J.; Bol, A. A. Correction to Nb Doping and Alloying of 2D WS<sub>2</sub> by Atomic Layer Deposition for 2D Transition Metal Dichalcogenide Transistors and HER Electrocatalysts. *ACS Appl. Nano Mater.* **2024**, *7* (10), 12205–12206. <https://doi.org/10.1021/acsanm.4c02304>.
- (6) Kapuria, N.; Patil, N. N.; Sankaran, A.; Laffir, F.; Geaney, H.; Magner, E.; Scanlon, M.; Ryan, K. M.; Singh, S. Engineering Polymorphs in Colloidal Metal Dichalcogenides: Precursor-Mediated Phase Control, Molecular Insights into Crystallisation Kinetics and Promising Electrochemical Activity. *J. Mater. Chem. A* **2023**, *11* (21), 11341–11353. <https://doi.org/10.1039/D2TA09892J>.
